# Supplementary material for: Status quo of ALK testing in lung cancer: results of an EQA scheme based on in-situ hybridization, immunohistochemistry, and RNA/DNA sequencing
Source: Springer Nature journal article supplement (doi:10.1007/s00428-021-03106-5), 2021-06-25
Supplement: MOESM1 [file 19293400]

| Participant | Case 1 | Case 2 | Case 3 | Case 4 | Case 5 | Case 6 | Case 7 | Case 8 | Case 9 | Case 10 |
|-------------|--------|--------|--------|--------|--------|--------|--------|--------|--------|---------|
| 1           | 15     | 15     | 15     | 15     | 15     | 15     | 15     | 15     | 15     | 15      |
| 2           | 250    | 250    | 250    | 250    | 250    | 250    | 250    | 250    | 250    | 250     |
| 3           | 200    | 200    | 144    | 97     | 200    | 200    | 110    | 48     | 200    | 194     |
| 4           | 154    | 150    | 150    | 161    | 84     | 164    | 165    | 133    | 98     | 147     |
| 5           | 31     | 34     | 60     | 24     | 21     | 44     | 20     | 29     | 16     | 50      |
| 6           | 15     | 20     | 20     | 15     | 15     | 15     | 20     | 20     | 15     | 15      |
| 7           | 50     | 50     | 50     | 50     | 50     | 50     | 50     | 50     | 50     | 50      |
| 8           | 50     | 50     | 100    | 50     | 100    | 100    | 100    | 100    | 100    | 100     |
| 9           | 85     | 76     | 85     | 65     | 42     | 85     | 42     | 51     | 8      | 85      |
| 10          | 99     | 189    | 219    | 130    | 83     | 265    | 94     | 74     | 62     | 232     |
| 11          | 150    | 150    | 150    | 150    | 150    | 150    | 150    | 150    | 150    | 150     |
| 12          | 200    | 200    | 158    | 200    | 200    | 200    | 200    | 200    | 200    | 200     |
| 13          | 100    | 100    | 100    | 100    | 100    | 100    | 100    | 100    | 100    | 100     |
| 14          | 10     | 10     | 10     | 10     | 10     | 10     | 10     | 10     | 10     | 10      |
| 15          | 250    | 250    | 250    | 250    | 216    | 250    | 249    | 180    | 250    | 250     |
| Median      | 99     | 100    | 100    | 97     | 84     | 100    | 100    | 74     | 98     | 100     |
| Minimum     | 10     | 10     | 10     | 10     | 10     | 10     | 10     | 10     | 8      | 10      |
| Maximum     | 250    | 250    | 250    | 250    | 250    | 265    | 250    | 250    | 250    | 250     |

**Supplementary Table S1** Table summarizing the amount of nucleic acids for RNA/DNA sequencing in nanograms.

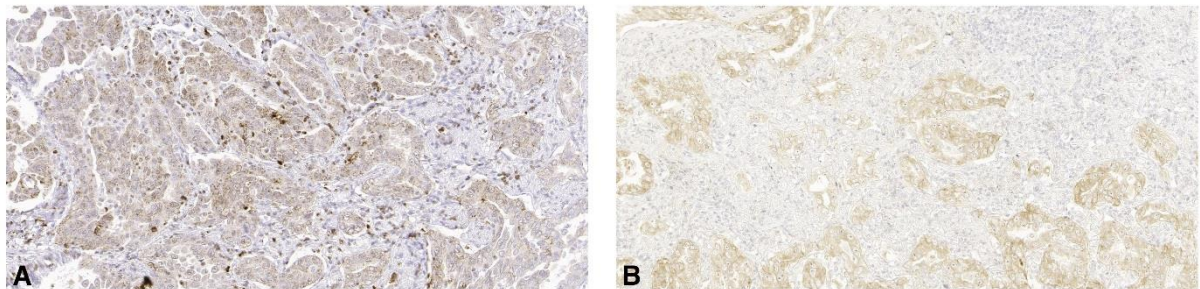

**Supplementary Figure S1** Staining patterns that were observed during the central reevaluation of immunohistochemical (IHC) stains that were falsely classified as ALK negative.

**A** Representative image of a case with weak immunoreactivity and an aberrant, so-called "stippled staining" pattern.

**B** Representative image of an IHC staining with weak positivity.
